# Supplementary material for: Renin‐Angiotensin System Inhibitors in Patients With COVID‐19: A Meta‐Analysis of Randomized Controlled Trials Led by the International Society of Hypertension
Source: PubMed Central journal article supplement (PMC9496439; doi:10.1161/jaha.122.026143), 2022-08-24

# **SUPPLEMENTAL MATERIAL**

## Data S1. Trials that contributed grouped tabular data

| Trial Name                                          | Trial Team                                                                                                                                                                                                                                                                                                                                                                                                                                                                                                                                                                                                                          |
|-----------------------------------------------------|-------------------------------------------------------------------------------------------------------------------------------------------------------------------------------------------------------------------------------------------------------------------------------------------------------------------------------------------------------------------------------------------------------------------------------------------------------------------------------------------------------------------------------------------------------------------------------------------------------------------------------------|
| ACEI-COVID                                          | <p>Team: Bauer A, Sappler N, Dolejsi T, Tilg H, Aulinger BA, Weiss G, Bellmann-Weiler R, Adolf C, Wolf D, Pirklbauer M, Graziadei I, Gänzer H, von Bary C, May AE, Wöll E, von Scheidt W, Rassaf T, Duerschmied D, Brenner C, Kääb S, Metzler B, Joannidis M, Kain HU, Kaiser N, Schwinger R, Witzenbichler B, Alber H, Straube F, Hartmann N, Achenbach S, von Bergwelt-Baildon M, von Stülpnagel L, Schoenherr S, Forer L, Embacher-Aichhorn S, Mansmann U, Massberg S</p> <p>Funding: Austrian Science Fund and German Center for Cardiovascular Research.</p>                                                                   |
| RAAS-COVID                                          | <p>Team: Elharram M, Ni J, Afilalo J, Flannery A, Ezekowitz JA, Cheng MP, Ambrosy AP, Zannad F, Brophy J, Giannetti N, Bessissow A, Kronfli N, Marelli A, Aziz H, Alqahtani M, Aflaki M, Craig M, Lopes RD, Ferreira JP</p> <p>Funding: McGill Interdisciplinary Initiative in Infection and Immunity (MI4) and the Division of Cardiology at McGill University.</p>                                                                                                                                                                                                                                                                |
| REPLACE-COVID                                       | <p>Team: Hanff TC, William P, Sweitzer N, Rosado-Santander NR, Medina C, Rodriguez-Mori JE, Renna N, Chang TI, Corrales-Medina V, Andrade-Villanueva JF, Barbagelata A, Cristodulo-Cortez R, Díaz-Cucho OA, Spaak J, Alfonso CE, Valdivia-Vega R, Villavicencio-Carranza M, Ayala-García RJ, Castro-Callirgos CA, González-Hernández LA, Bernales-Salas EF, Coacalla-Guerra JC, Salinas-Herrera CD, Nicolosi L, Basconcel M, Byrd JB, Sharkoski T, Bendezú-Huassasquiche LE, Chittams J, Edmonston DL, Vasquez CR</p> <p>Funding: REPLACE COVID Investigators, REPLACE COVID Trial Social Fundraising Campaign, and FastGrants.</p> |
| SWITCH-COVID                                        | <p>Team: Girardi ACC, Tavares CAM, Cardozo FAM, Betonico GN, de Almeida L</p> <p>Funding: University of Sao Paulo</p>                                                                                                                                                                                                                                                                                                                                                                                                                                                                                                               |
| ALPS-COVID IP                                       | <p>Team: Ingraham NE, Merck LH, Driver BE, Wacker DA, Black LP, Jones AE, Fletcher CV, South AM, Nelson AC, Lewandowski C, Farhat J, Benoit JL, Biros MH, Cherabuddi K, Chipman JG, Schacker TW, Guirgis FW, Voelker HT, Koopmeiners JS, Tignanelli CJ</p> <p>Funding: Bill and Melinda Gates Foundation, NIH</p>                                                                                                                                                                                                                                                                                                                   |
| ALPS-COVID OP                                       | <p>Team: Cummins NW, Ingraham NE, Wacker DA, Reilkoff RA, Driver BE, Biros MH, Bellolio F, Chipman JG, Nelson AC, Beckman K, Langlois R, Bold T, Aliota MT, Schacker TW, Voelker HT, Koopmeiners JS</p> <p>Funding: Minnesota Partnership for Biotechnology and Medical Genomics</p>                                                                                                                                                                                                                                                                                                                                                |
| COVERAGE-France                                     | <p>Team: Malvy D, Anglaret X, Richert L, Wittkop L, Lhomme E, Sitta R, Gelly A, Hardel L, Wallet C, Schwimmer C, Thiebaut R, Onaisi R, Saint-Lary O, Joseph JP, Dupouy J, Gimenez L, Boucaut A, Chastang J, Naccache JM, Piroth L, Biquet C, Lefèvre B, Makinson A, Picot MC, Montoya A, Crantelle L, Molimard M, Bouchet S, de Lamballerie X, Roussillon C, Landman R</p> <p>Funding: Ministère des Solidarités et de la Santé, Agence Nationale de la Recherche, ANRS   Maladies Infectieuses Emergentes, University of Bordeaux</p>                                                                                              |
| COVID MED                                           | <p>Team: Victory J, Jenkins P, Krupa N, Wheeler J, Vail GM, Riesenfeld E, Cross P, Gilmore C, Huckabone M, Schworm A, Boregowda U, Deshmukh F, Choi Y, Khan A, Gadomski A</p> <p>Funding: Bassett Healthcare, Reid Health, Goshen Health System</p>                                                                                                                                                                                                                                                                                                                                                                                 |
| PRAETORIAN-COVID                                    | <p>Team: Aarts GWA, Konijnenberg LSF, Mensink FB, Herrmann JJ.</p> <p>Funding: NLHI, the Dutch Heart Foundation, Novartis Pharma and ZonMW grant 10430012010020</p>                                                                                                                                                                                                                                                                                                                                                                                                                                                                 |
| STAR-COVID                                          | <p>Team: Ángeles-Duran GY, Flores-Gómez IR, Flores-Martínez E, Valdin-Orozco TI, Pedraza-Hervert C</p> <p>Funding: National Polytechnic Institute, Mexico</p>                                                                                                                                                                                                                                                                                                                                                                                                                                                                       |
| Telmisartan for treatment of patients with COVID-19 | <p>Team: Duarte M, Nicolosi LN, Salgado MV, Vetulli H, Aquieri A, Azzato F, Castro M, Coyle J, Davolos I, Criado IF, Gregori R, Mastrodonato P, Rubio MC, Sarquis S, Wahlmann F</p> <p>Funding: Facultad de Medicina (Universidad de Buenos Aires, Argentina), Hospital Espa~nol de Buenos Aires (Argentina) and Laboratorio Elea (Argentina)</p>                                                                                                                                                                                                                                                                                   |

**Table S1. Quality assessment of RCTs – Cochrane Collaboration Risk of Bias Tool.**

| <b>Trial Name</b>                                      | <b>Random sequence generation (selection bias)</b> | <b>Allocation concealment (selection bias)</b> | <b>Blinding of participants and researchers (performance bias)</b> | <b>Blinding of outcome assessment (detection bias)</b> | <b>Incomplete outcome data (attrition bias)</b> | <b>Selective reporting (reporting bias)</b> | <b>Other</b>                              |
|--------------------------------------------------------|----------------------------------------------------|------------------------------------------------|--------------------------------------------------------------------|--------------------------------------------------------|-------------------------------------------------|---------------------------------------------|-------------------------------------------|
| ACEI-COVID                                             | Low risk                                           | High risk                                      | High risk                                                          | Low risk                                               | Low risk                                        | Low risk                                    | Open label trial                          |
| BRACE-CORONA                                           | Low risk                                           | High risk                                      | High risk                                                          | Low risk                                               | Low risk                                        | Low risk                                    | Open label trial                          |
| RAAS-COVID                                             | Low risk                                           | High risk                                      | High risk                                                          | Unclear risk                                           | Low risk                                        | Low risk                                    | Open label trial                          |
| REPLACE-COVID                                          | Low risk                                           | High risk                                      | High risk                                                          | Low risk                                               | Low risk                                        | Low risk                                    | Open label trial                          |
| SWITCH-COVID                                           | Low risk                                           | High risk                                      | High risk                                                          | Low risk                                               | Low risk                                        | Low risk                                    | Open label trial                          |
| ALPS-COVID IP                                          | Low risk                                           | Low risk                                       | Low risk                                                           | Low risk                                               | Low risk                                        | Low risk                                    | Placebo controlled                        |
| ALPS-COVID OP                                          | Low risk                                           | Low risk                                       | Low risk                                                           | Low risk                                               | Low risk                                        | Low risk                                    | Placebo controlled                        |
| ARB use to minimize progression to respiratory failure | Low risk                                           | High risk                                      | High risk                                                          | Unclear risk                                           | Low risk                                        | Low risk                                    | Open label trial                          |
| COVERAGE-France                                        | Low risk                                           | High risk                                      | High risk                                                          | Low risk                                               | Low risk                                        | Low risk                                    | Open label trial                          |
| COVID MED                                              | Low risk                                           | Low risk                                       | Low risk                                                           | Low risk                                               | Low risk                                        | Low risk                                    | Placebo controlled                        |
| Evaluation of the effect of losartan in COVID-19       | Low risk                                           | Low risk                                       | Low risk                                                           | Low risk                                               | Low risk                                        | Low risk                                    | Comparator amlodipine rather than placebo |
| PRAETORIAN-COVID                                       | Low risk                                           | Low risk                                       | Low risk                                                           | Low risk                                               | Low risk                                        | Low risk                                    | Placebo controlled                        |
| STAR-COVID                                             | Low risk                                           | High risk                                      | High risk                                                          | Low risk                                               | Low risk                                        | Low risk                                    | Open label trial                          |
| Telmisartan for treatment of patients with COVID-19    | Low risk                                           | High risk                                      | High risk                                                          | Unclear risk                                           | High risk                                       | Unclear risk                                | Open label trial loss to follow-up:>10%   |

**Table S2. Sensitivity analyses to account for small counts in trials\***

|                                               | <b>Original analyses<br/>RR, 95%CI</b> | <b>Sensitivity analyses*<br/>RR, 95%CI</b> |
|-----------------------------------------------|----------------------------------------|--------------------------------------------|
| <b>Mortality</b>                              | RR 0.95 (0.69-1.30), p=0.73            | RR 0.95 (0.69-1.30), p=0.73                |
| <b>Myocardial infarction</b>                  | RR 0.59 (0.33-1.06), p=0.08            | RR 0.60 (0.24-1.06), p=0.08                |
| <b>Intensive care admission</b>               | RR 1.00 (0.77-1.30), p=0.98            | RR 1.02 (0.78-1.32), p=0.90                |
| <b>Mechanical ventilation</b>                 | RR 1.00 (0.76-1.31), p=0.99            | RR 1.02 (0.77-1.35), p=0.90                |
| <b>Hypotension requiring inotropes</b>        | RR 1.01 (0.73-1.41), p=0.93            | RR 1.01 (0.73-1.41), p=0.93                |
| <b>Acute kidney injury</b>                    | RR 1.82 (1.05-3.16), p=0.03            | RR 1.82 (1.05-3.14), p=0.03                |
| <b>Acute kidney injury requiring dialysis</b> | RR 1.15 (0.60-2.21), p=0.67            | RR 1.15 (0.60-2.19), p=0.68                |

RR relative risk, CI confidence interval

\*Sensitivity analysis using the reciprocal of the sample size of the opposite arm to the cells in tables with zeroes

**Figure S1. Quality assessment of RCTs – Cochrane Collaboration Risk of Bias Tool.**

| Study or Subgroup                                 | IASI<br>Total | Control<br>Total | Risk of Bias |   |   |   |   |   |   |
|---------------------------------------------------|---------------|------------------|--------------|---|---|---|---|---|---|
|                                                   |               |                  | A            | B | C | D | E | F | G |
| ACE-COVID                                         | 100           | 104              | +            | + | + | + | + | + | + |
| ALPS COVID IP                                     | 101           | 104              | +            | + | + | + | + | + | + |
| ALPS-COVID OP                                     | 58            | 59               | +            | + | + | + | + | + | + |
| ARB use to minimize respiratory failure           | 16            | 15               | +            | + | + | + | + | + | + |
| BRACE CORONA                                      | 325           | 334              | +            | + | + | + | + | + | + |
| COVERAGE France                                   | 36            | 33               | +            | + | + | + | + | + | + |
| COVID MED                                         | 9             | 3                | +            | + | + | + | + | + | + |
| Evaluation of the effects of losartan in COVID-19 | 41            | 39               | +            | + | + | + | + | + | + |
| PRAETORIAN-COVID                                  | 11            | 12               | +            | + | + | + | + | + | + |
| RAAS-COVID                                        | 25            | 21               | +            | + | + | + | + | + | + |
| REPLACE COVID                                     | 75            | 77               | +            | + | + | + | + | + | + |
| STAR-COVID                                        | 32            | 32               | +            | + | + | + | + | + | + |
| SWITCH-COVID                                      | 10            | 8                | +            | + | + | + | + | + | + |
| Telmisartan for treatment of COVID-19             | 78            | 80               | +            | + | + | + | + | + | + |
|                                                   | 917           | 921              |              |   |   |   |   |   |   |

Risk of bias legend  
 (A) Random sequence generation (selection bias)  
 (B) Allocation concealment (selection bias)  
 (C) Blinding of participants and personnel (performance bias)  
 (D) Blinding of outcome assessment (detection bias)  
 (E) Incomplete outcome data (attrition bias)  
 (F) Selective reporting (reporting bias)  
 (G) Other bias

**Figure S2: All-Cause Mortality – Start vs Continue/Discontinue Trials**

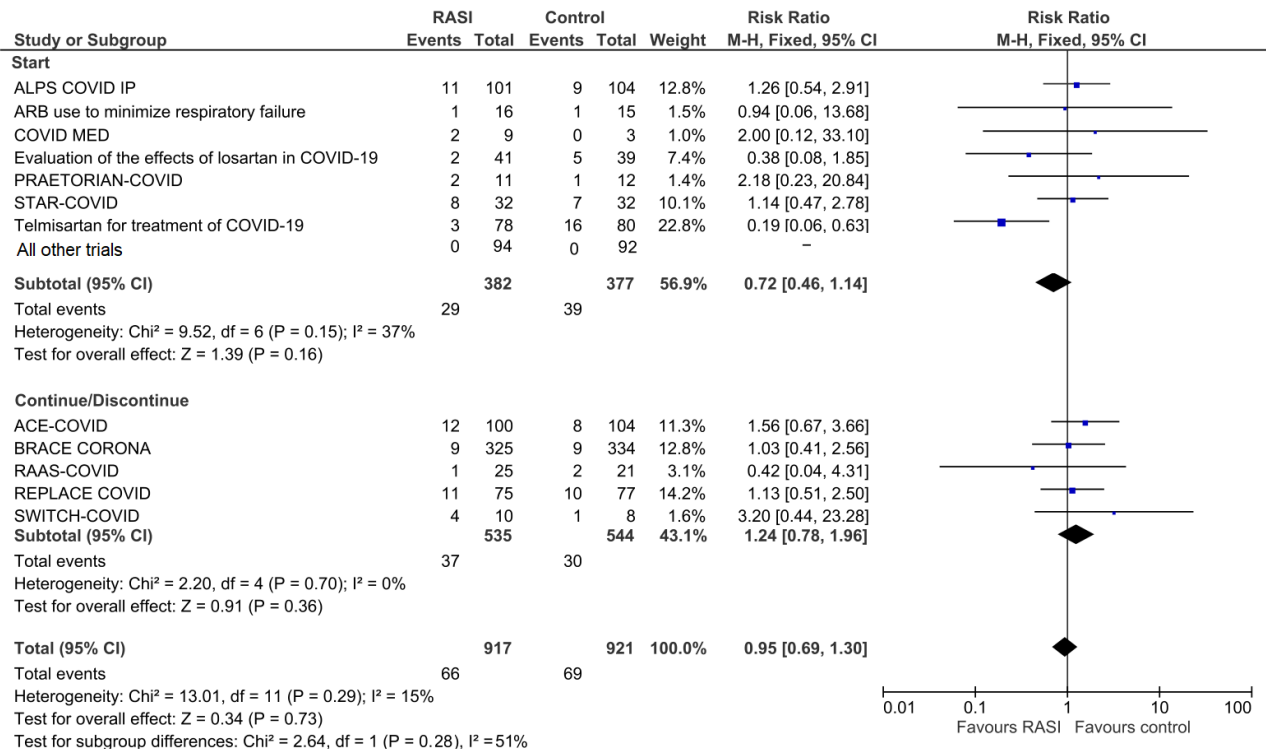

**Figure S3: All-Cause Mortality – Placebo Control vs Open Label Trials**

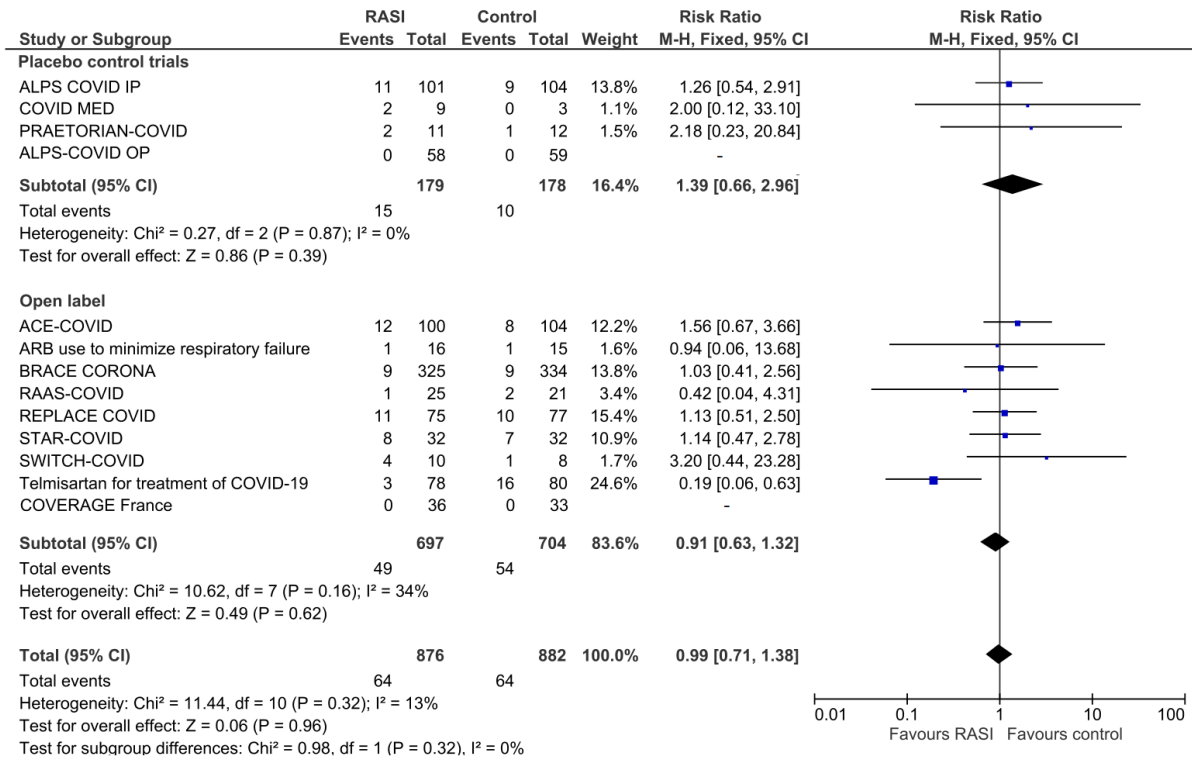

**Figure S4: All-Cause Mortality – Trial Location**

**(A) Random Effect**

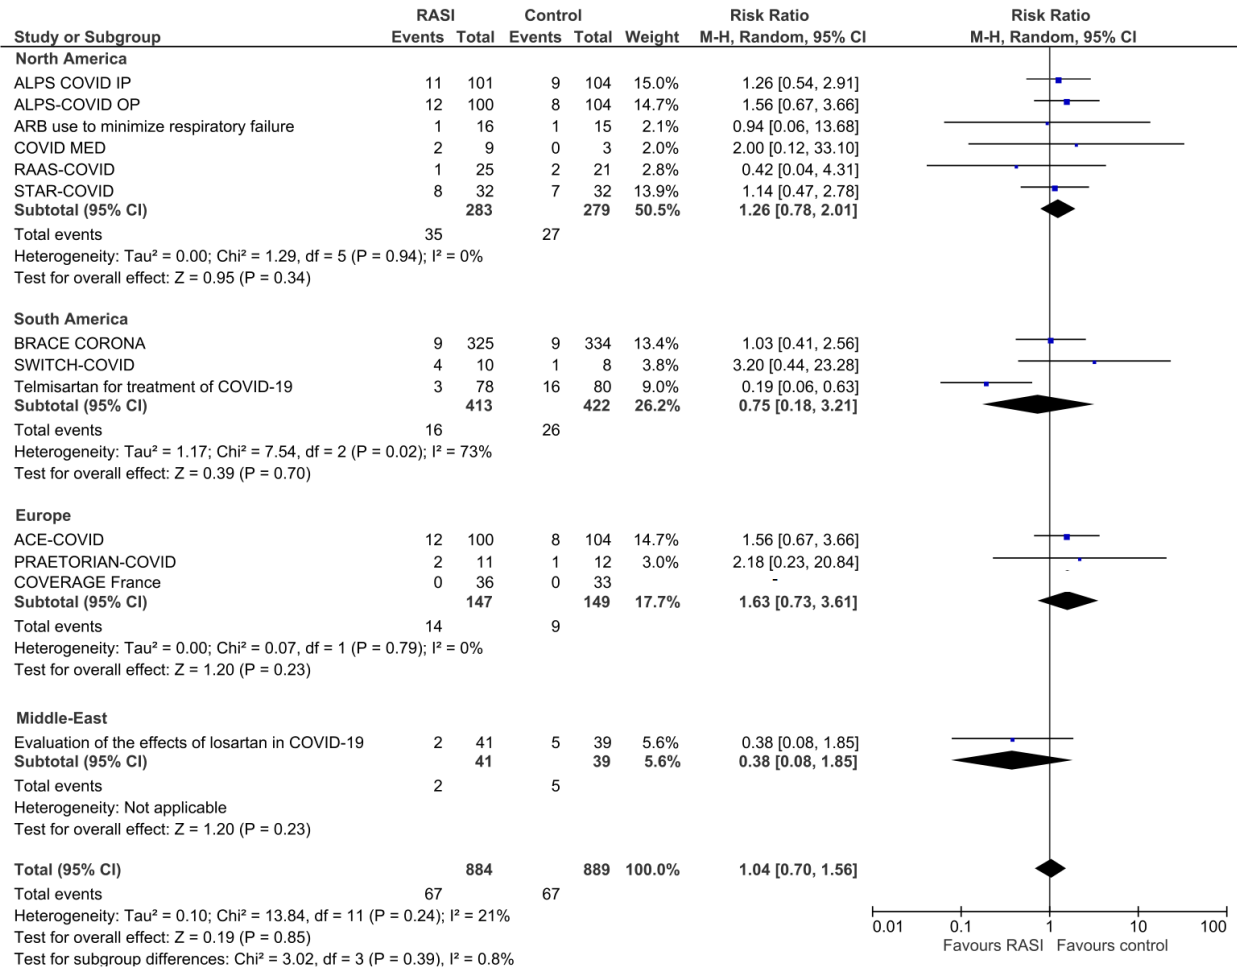



## (B) Fixed Effects

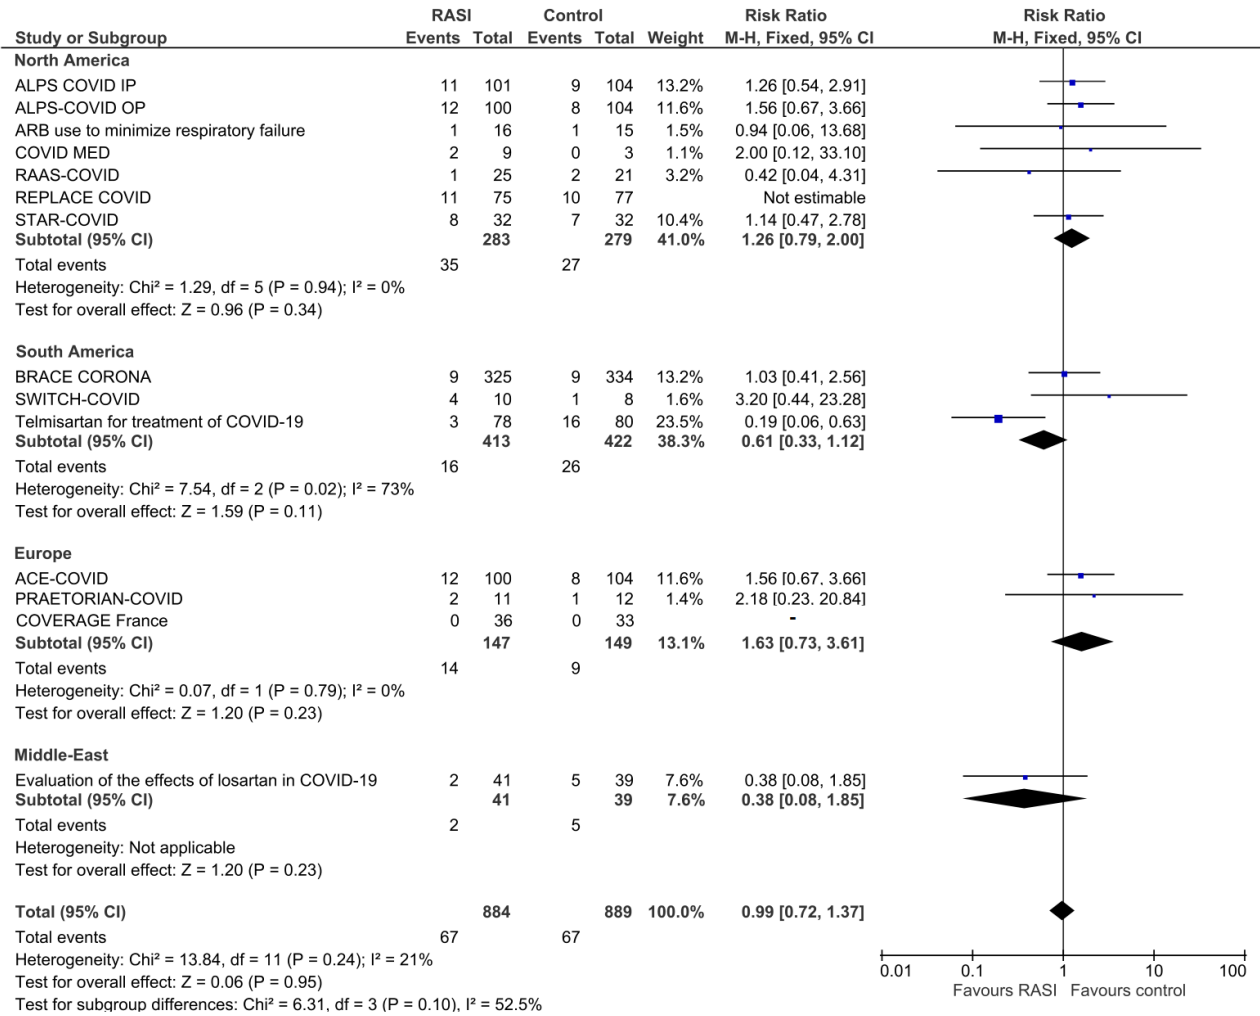

**Figure S5: All-Cause Mortality – Severity of COVID-19**

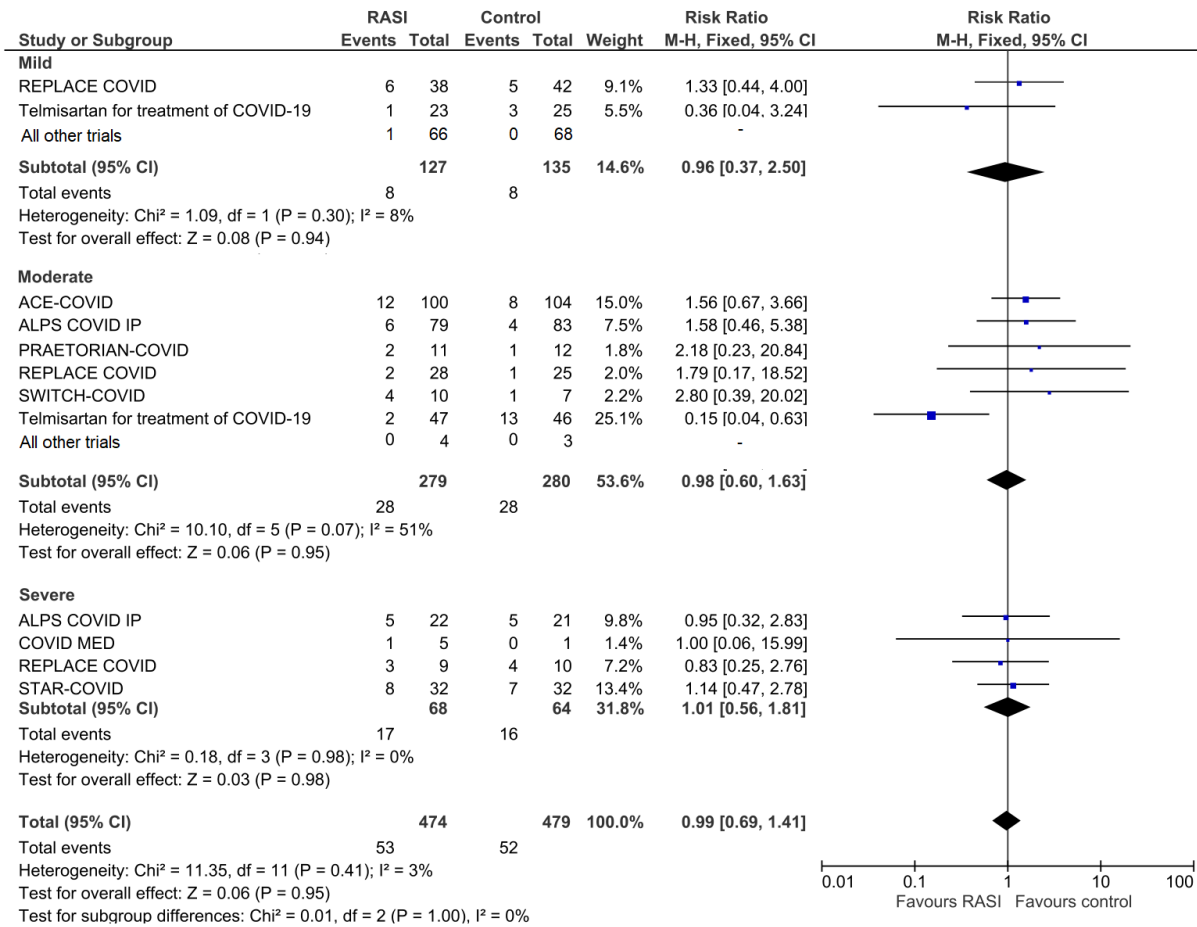

**Figure S6: All-Cause Mortality by Angiotensin II type 1 Receptor Blocker**

**(A) Random Effects**

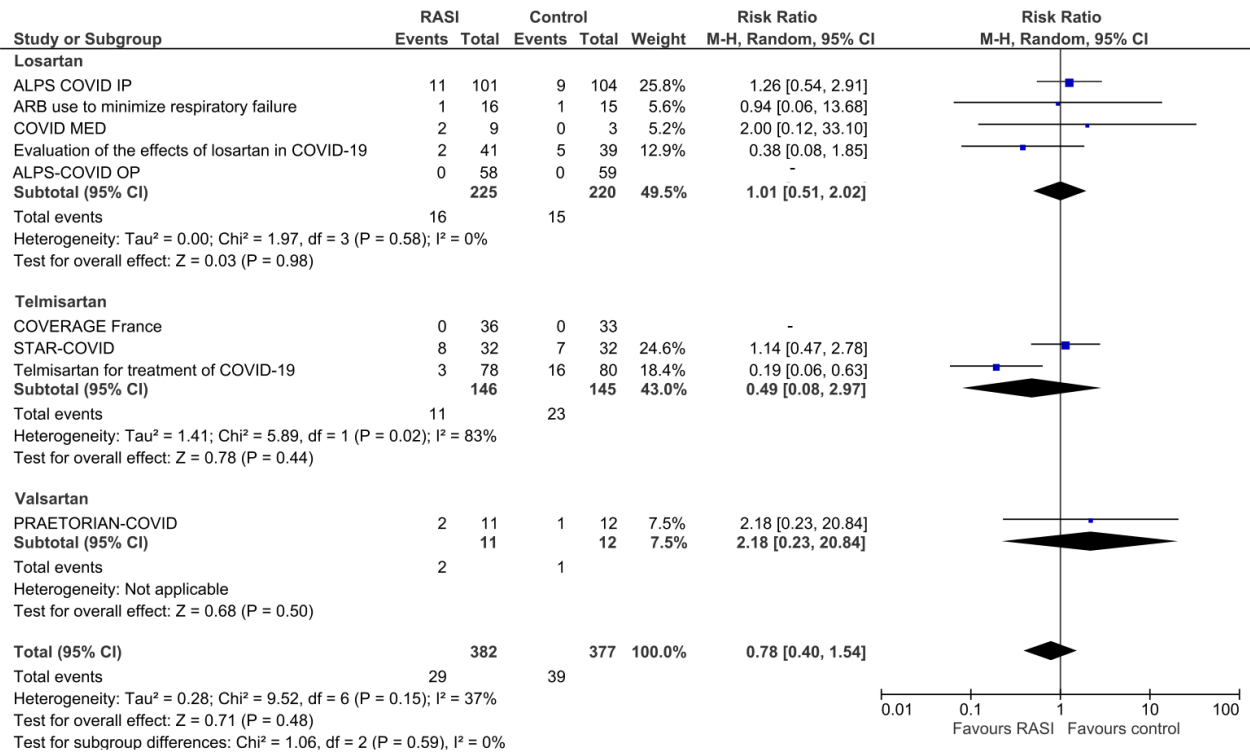

**(B) Fixed Effects**

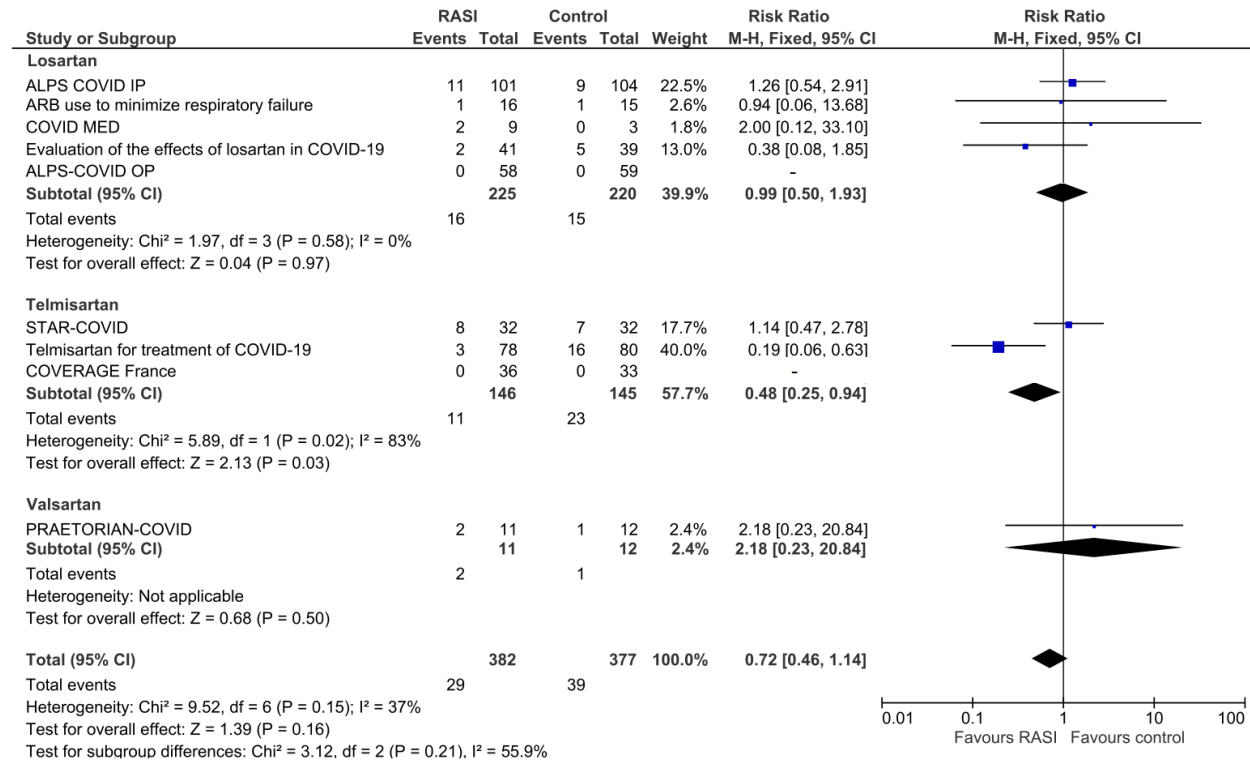

**Figure S7: Publication bias and all-cause mortality**

(A) Observed trials; (B) Observed and imputed trials.

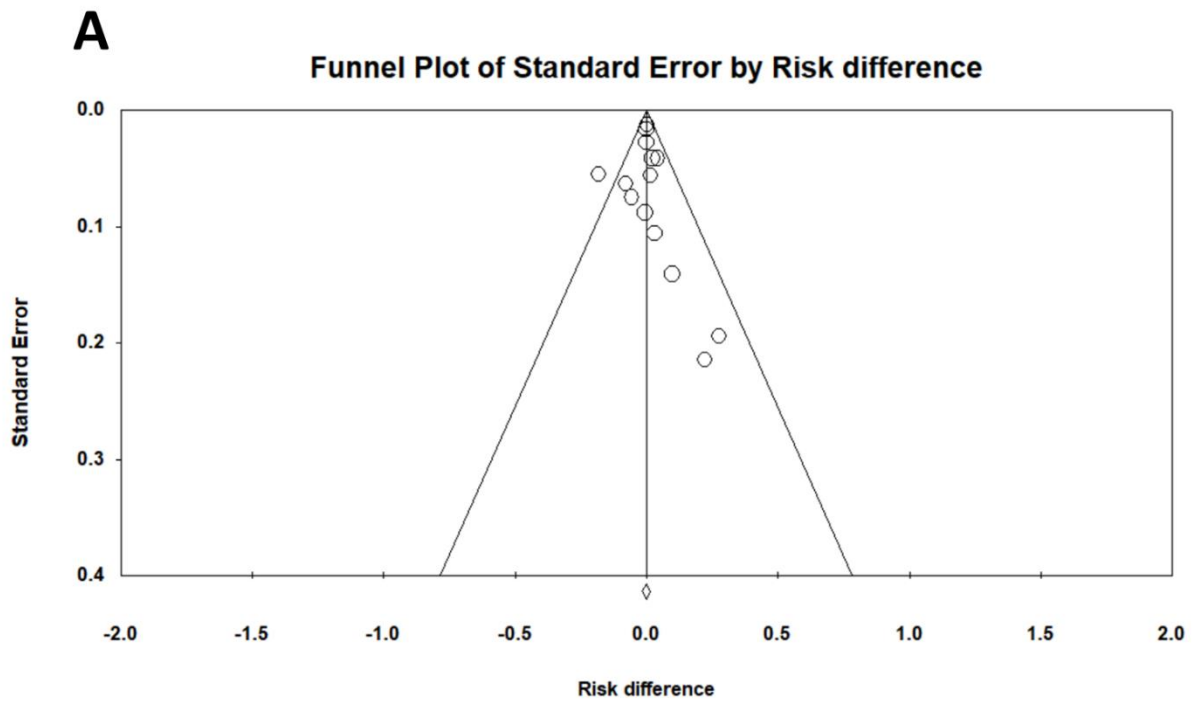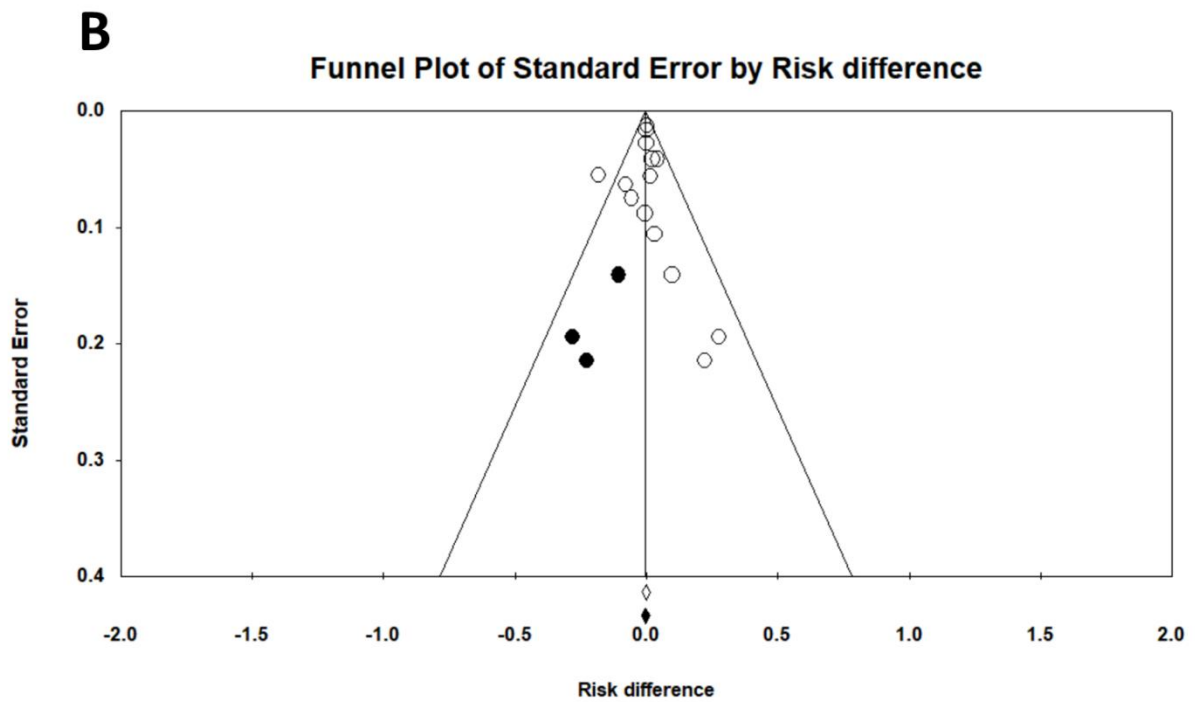

Open circles: observed trials; closed black circles: imputed trials

**Figure S8: All-Cause Mortality – Age subgroups**

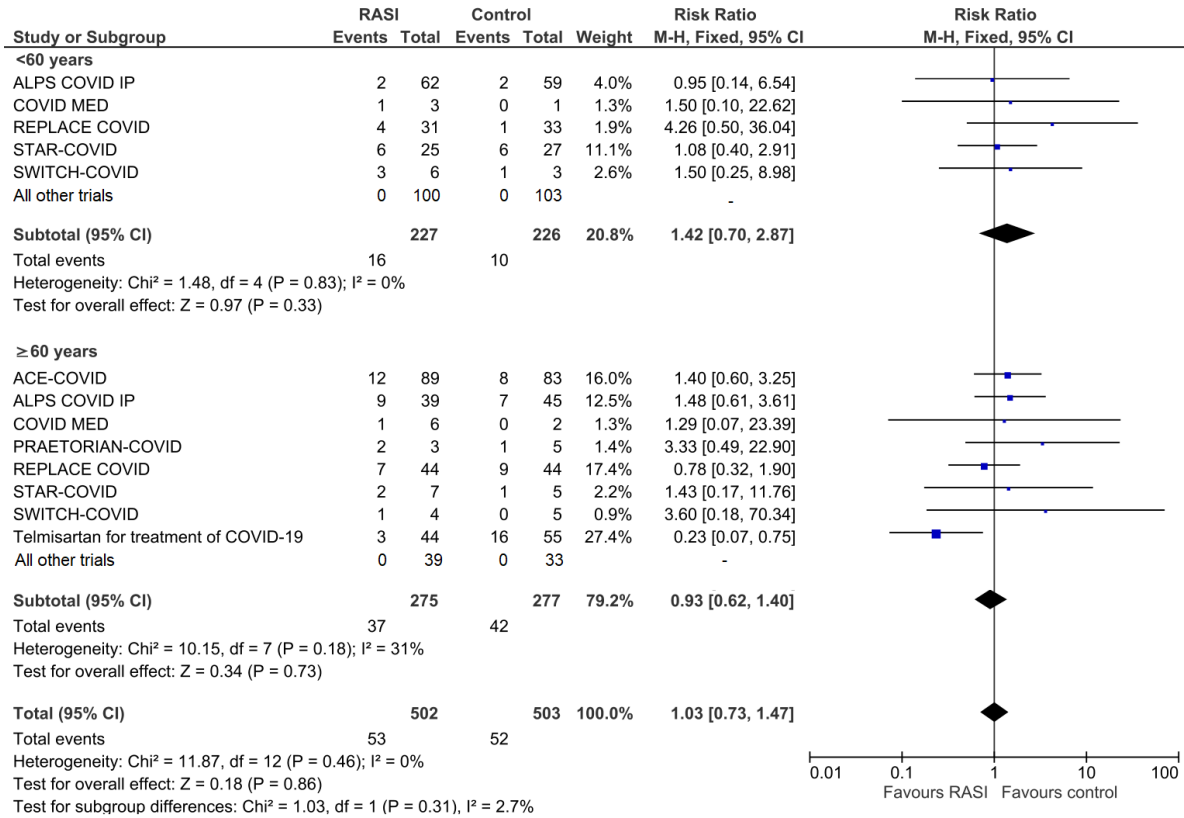

**Figure S9: All-Cause Mortality – Sex**

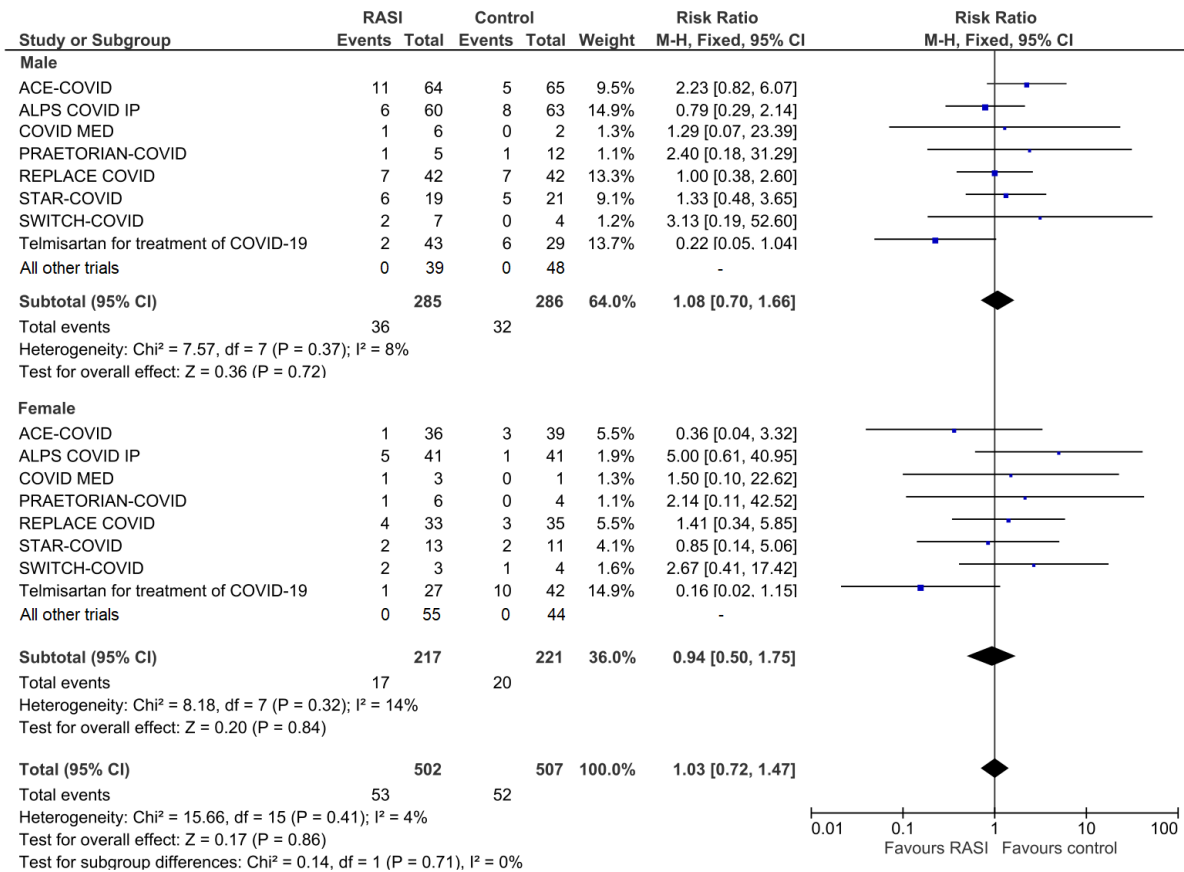

**Figure S10: All-Cause Mortality – Ethnicity**

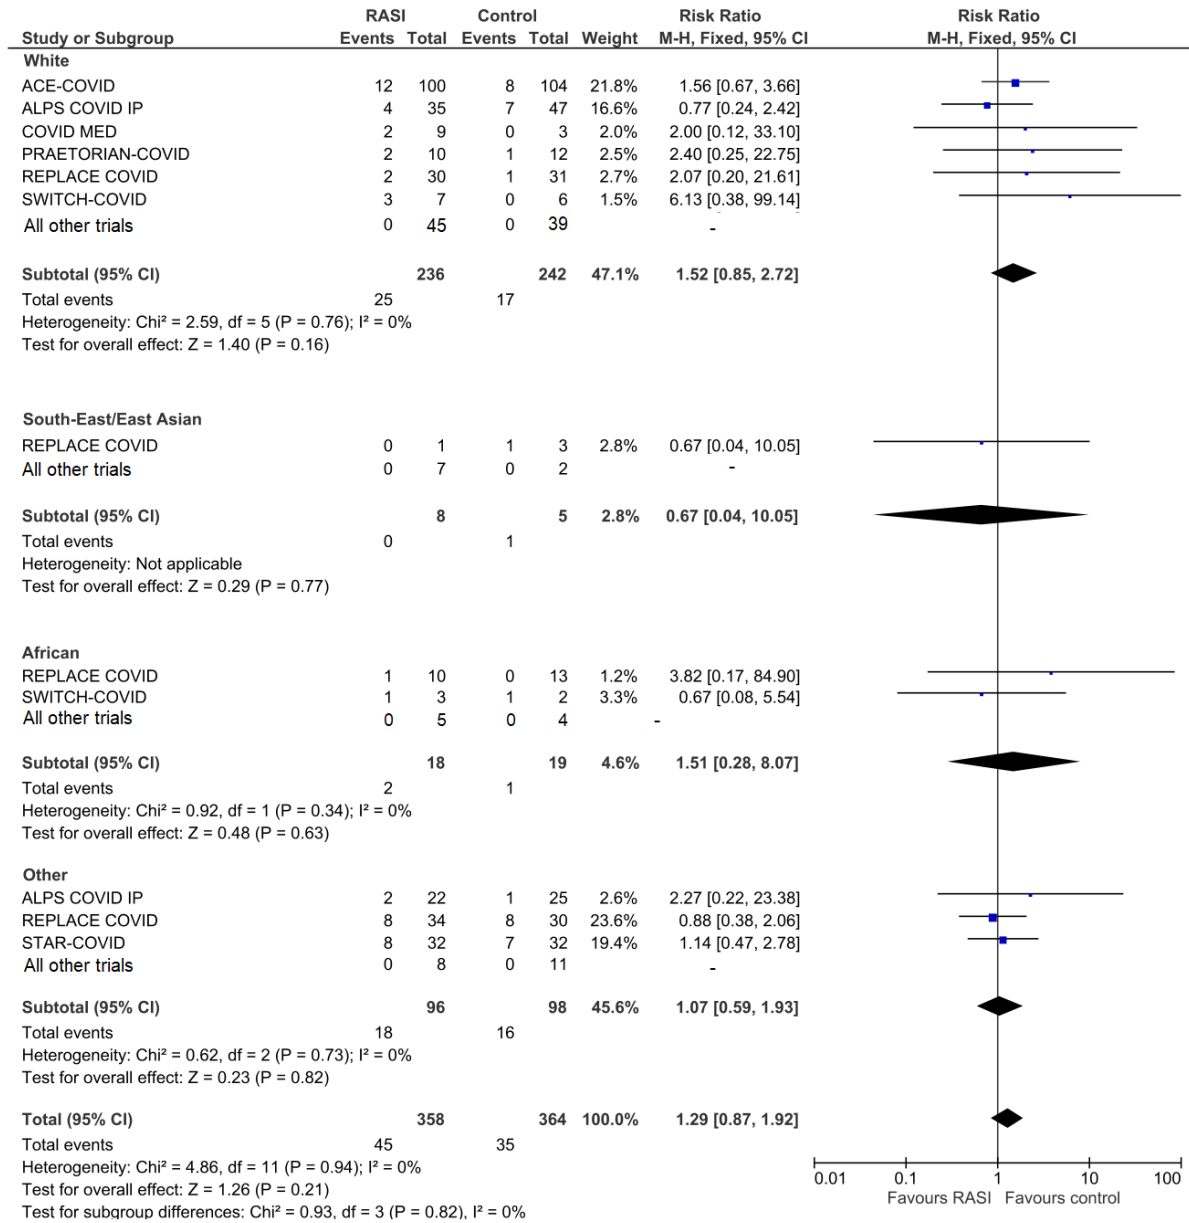

**Figure S11: All-Cause Mortality – COPD vs no COPD**

**(A) Random Effects**

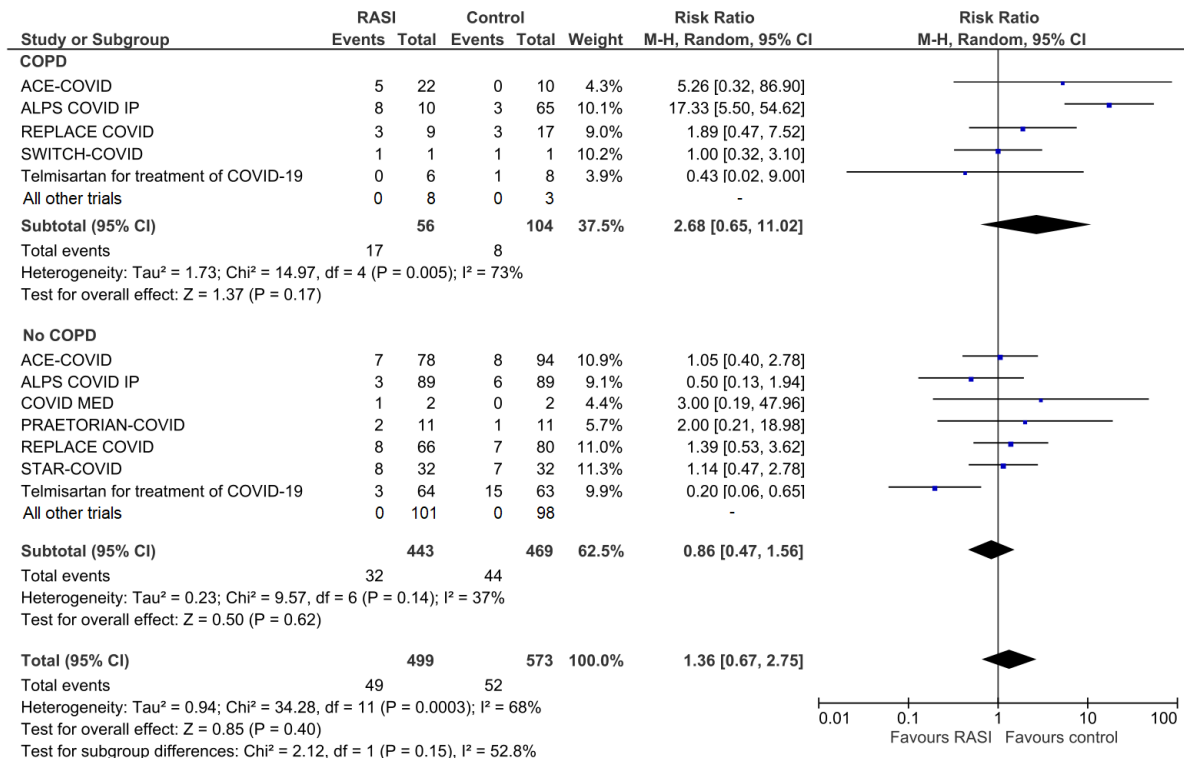

**(B) Fixed Effects**

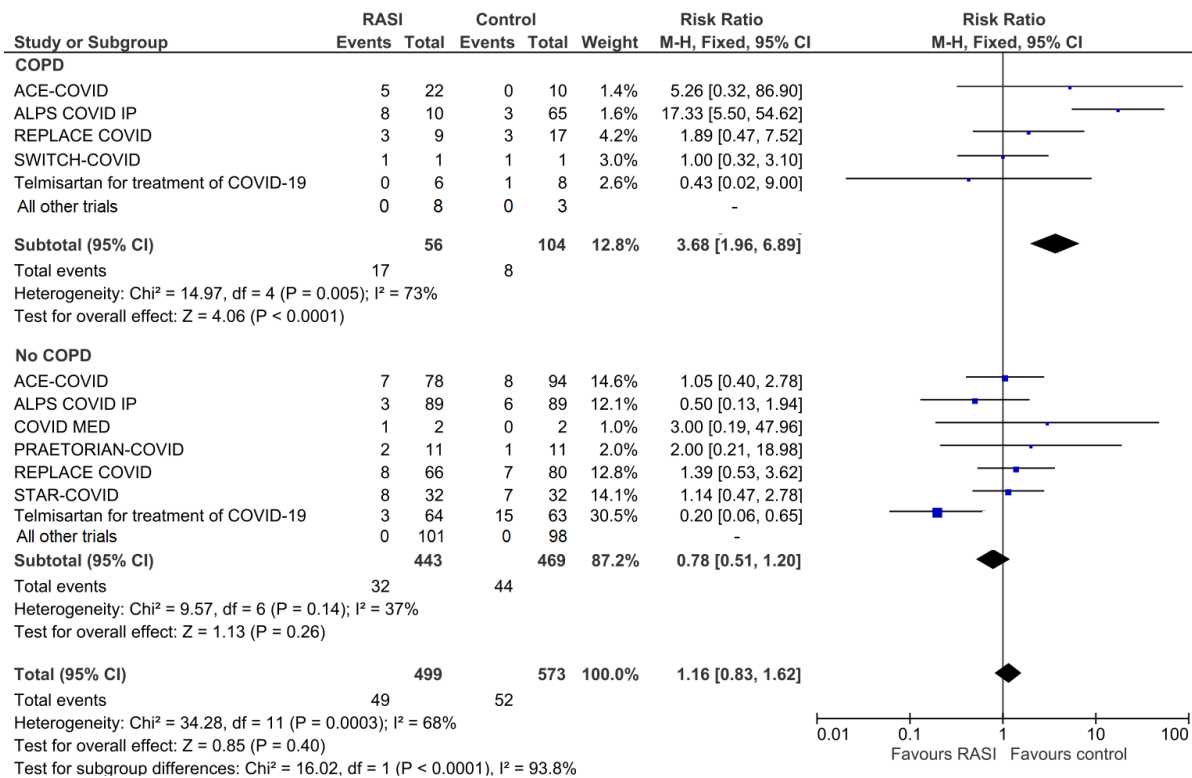



**Figure S12: All-Cause Mortality – Hypertension vs no Hypertension**

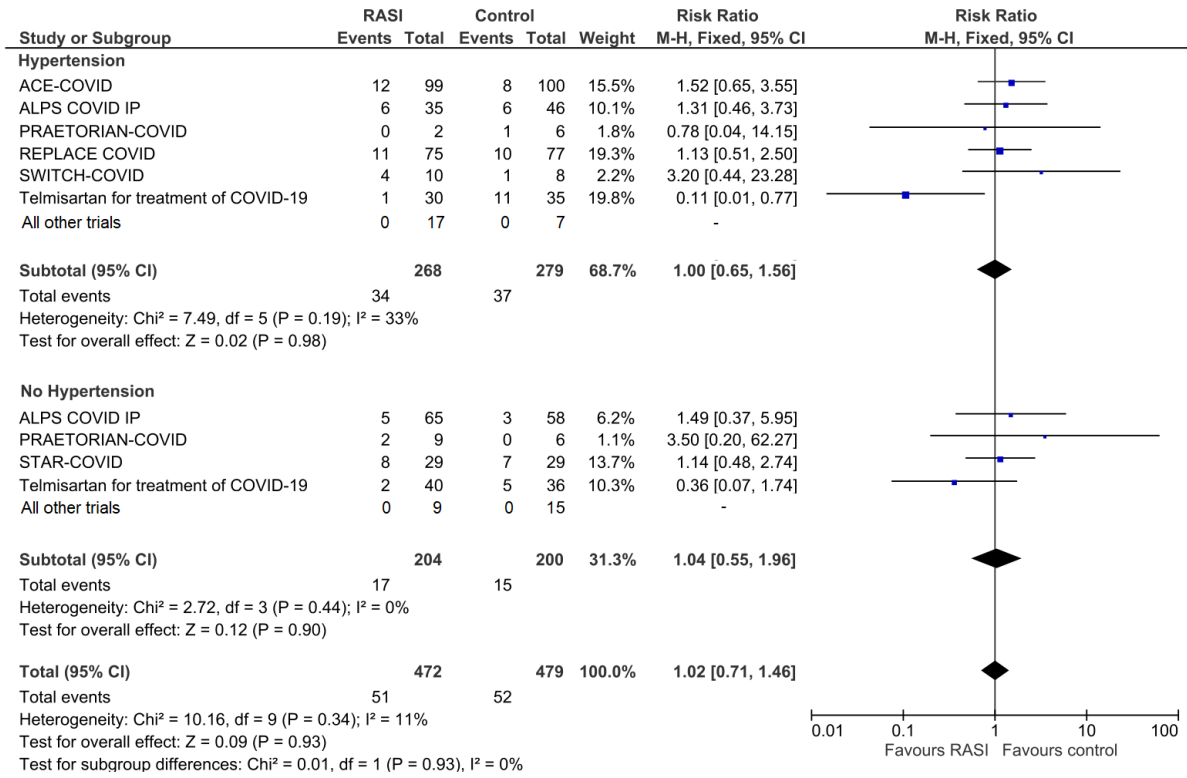

**Figure S13: All-Cause Mortality – Diabetes Mellitus vs no Diabetes**

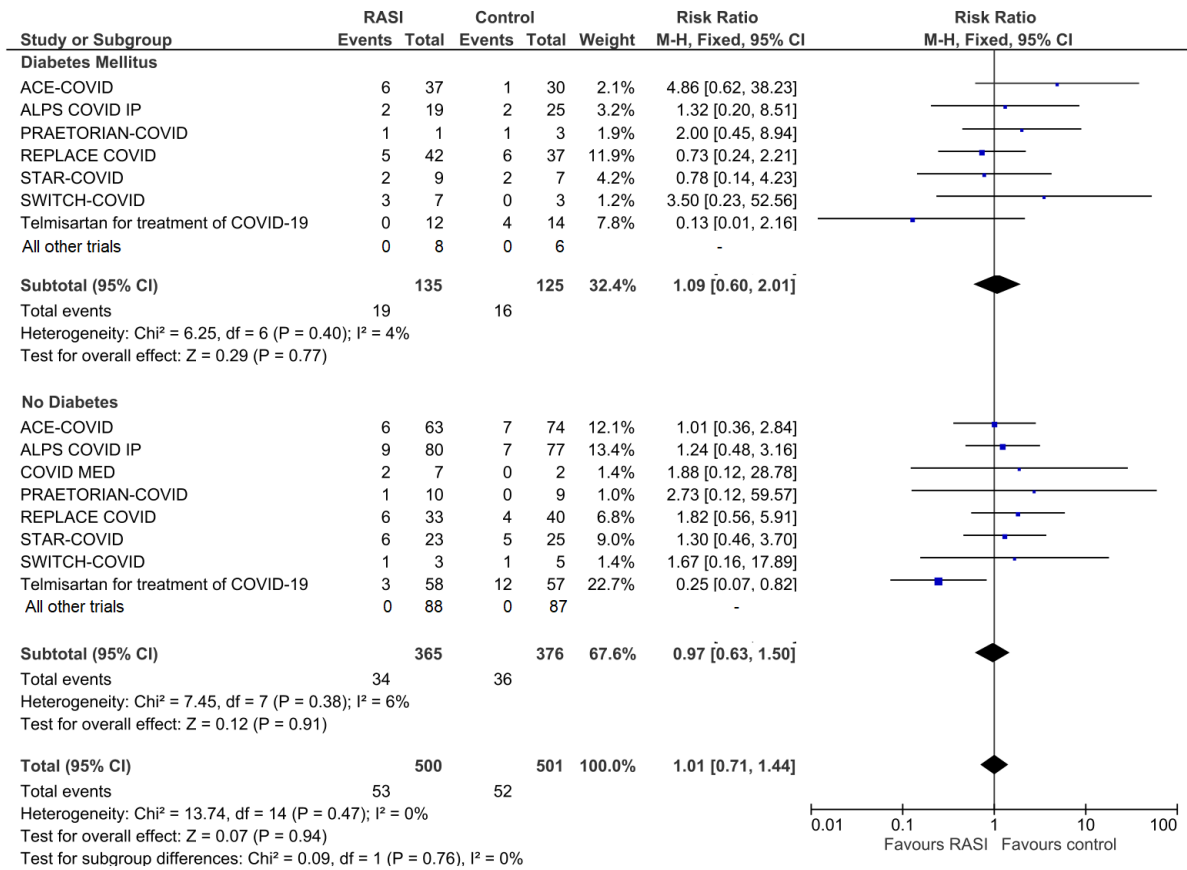

**Figure S14: All-Cause Mortality – Obesity vs No Obesity**

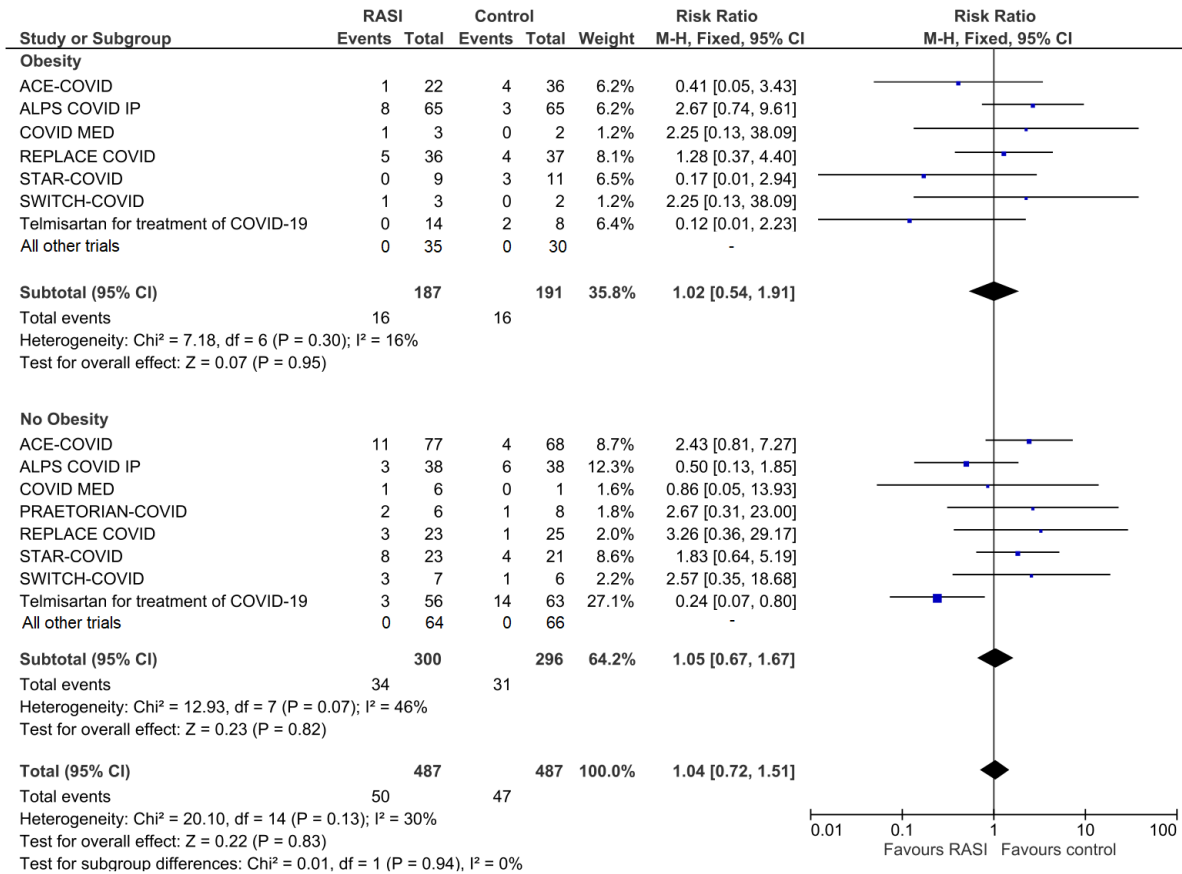

**Figure S15: All-Cause Mortality – CVD vs no CVD**

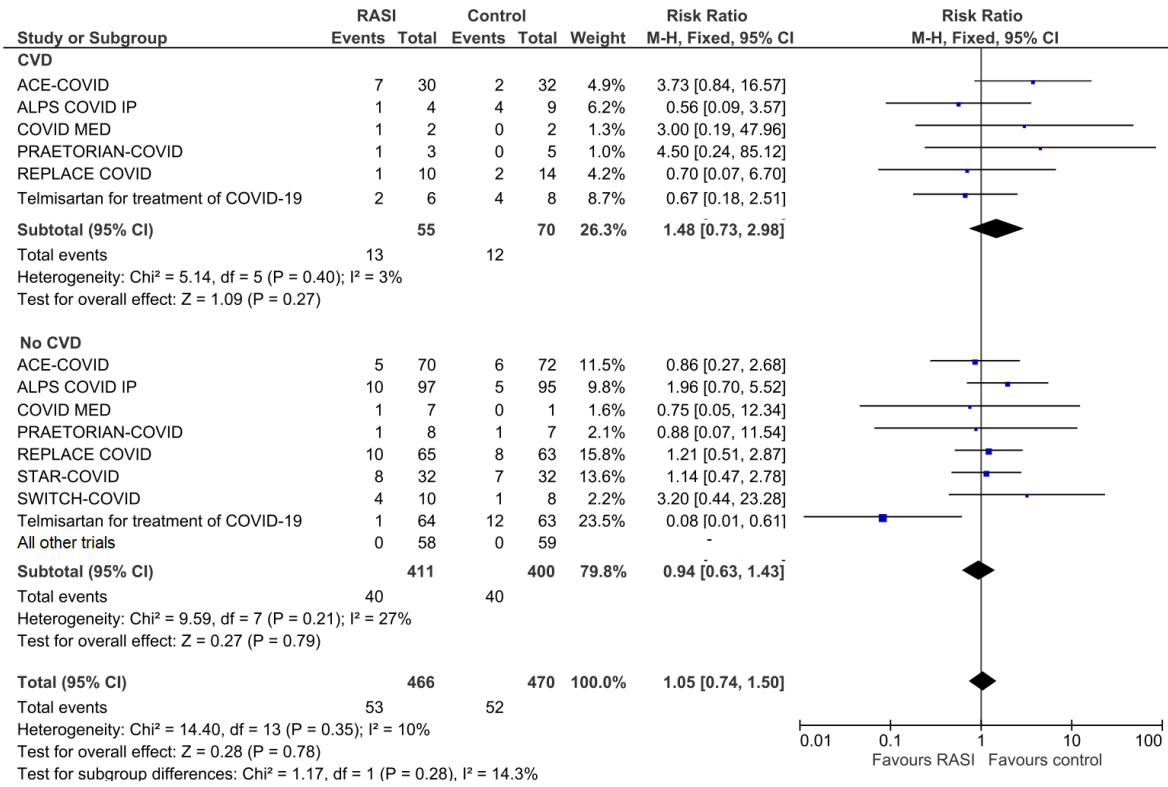

**Figure S16: All-Cause Mortality – CKD vs no CKD**

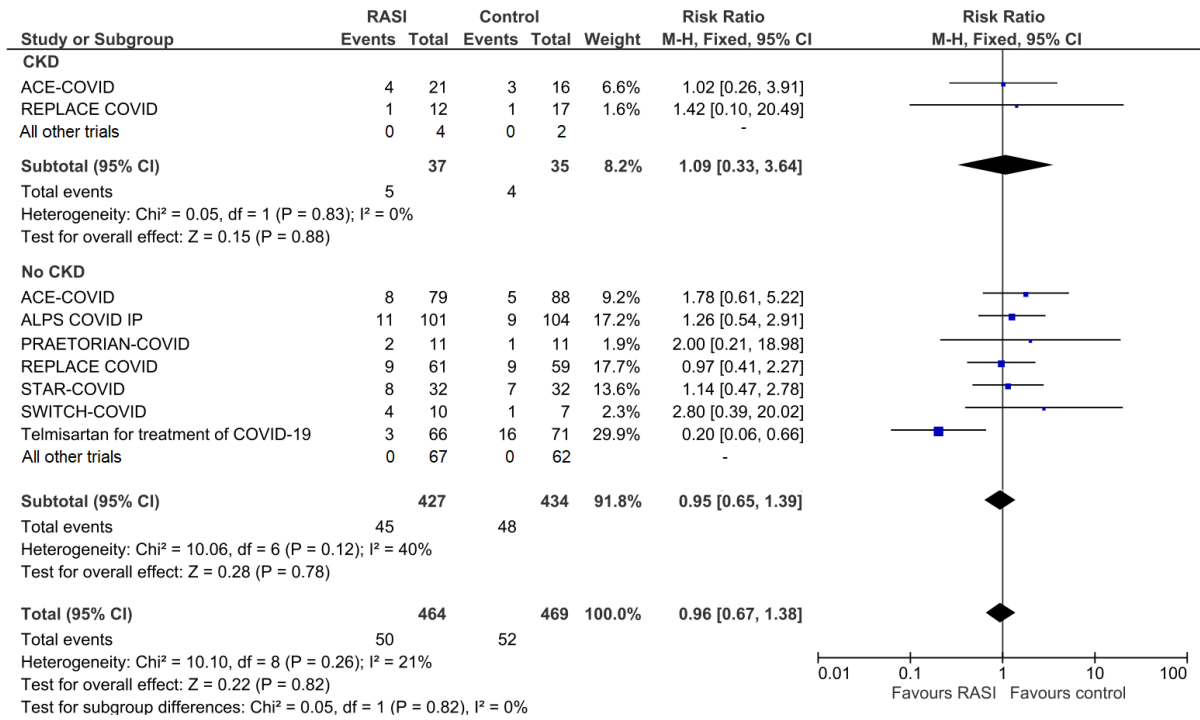

**Figure S17: All-Cause Mortality - Smoker vs Non-Smoker**

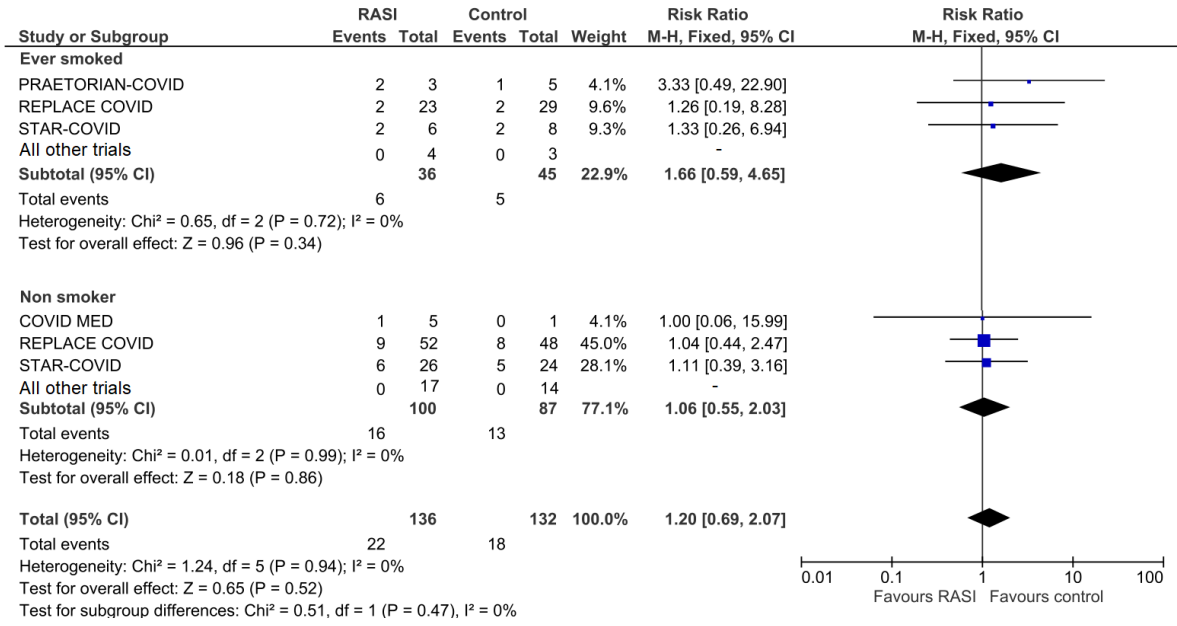

**Figure S18: Meta-regression of loss to follow-up versus all-cause mortality**

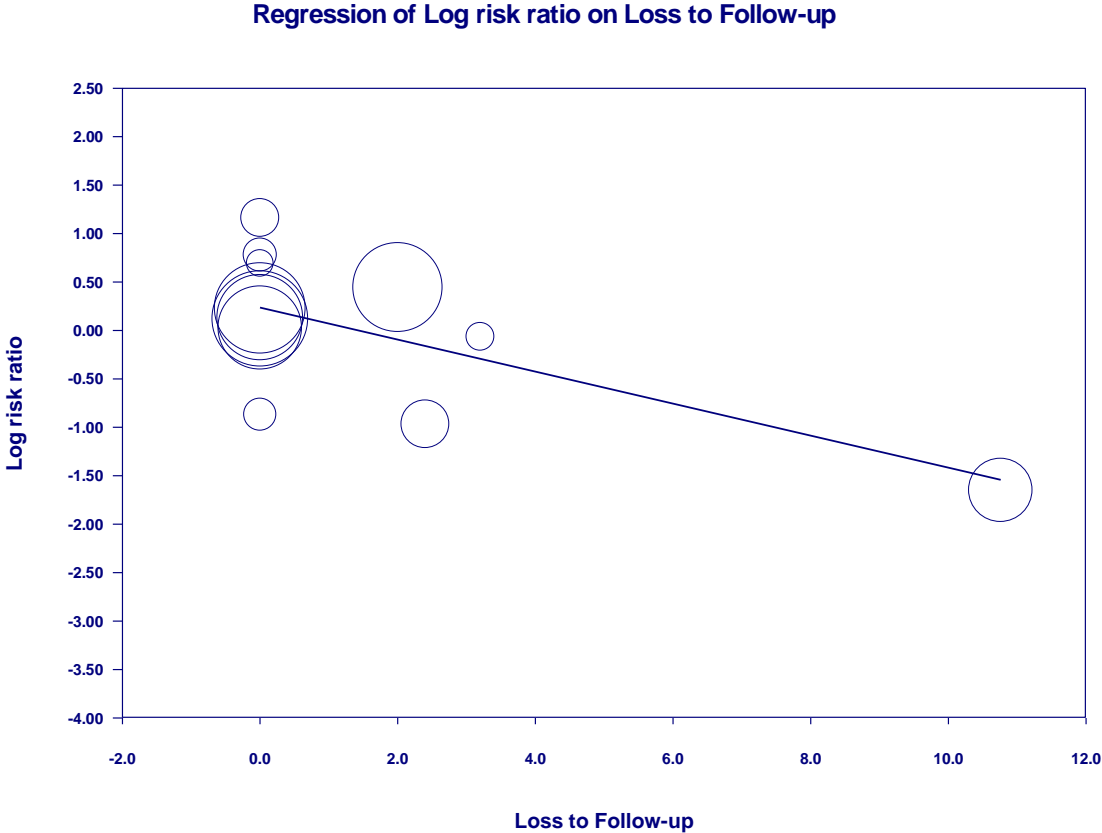

**Figure S19: Network Meta-analysis comparing control vs ACEi or ARB – Mortality Risk Ratio with 95%CI.**

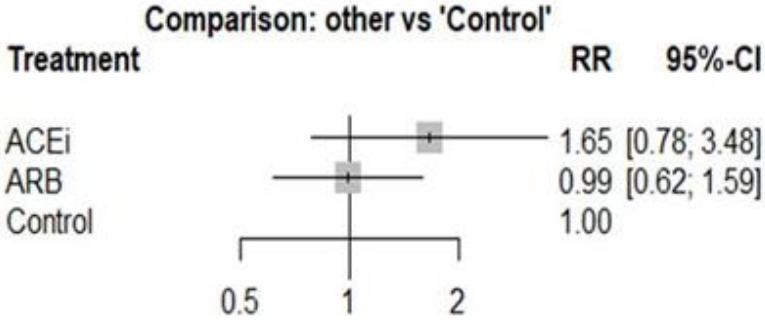



**Figure S20: Network Meta-analysis comparing control, ACEi and ARB Rankogram Plot - Probability of having a specific rank.**

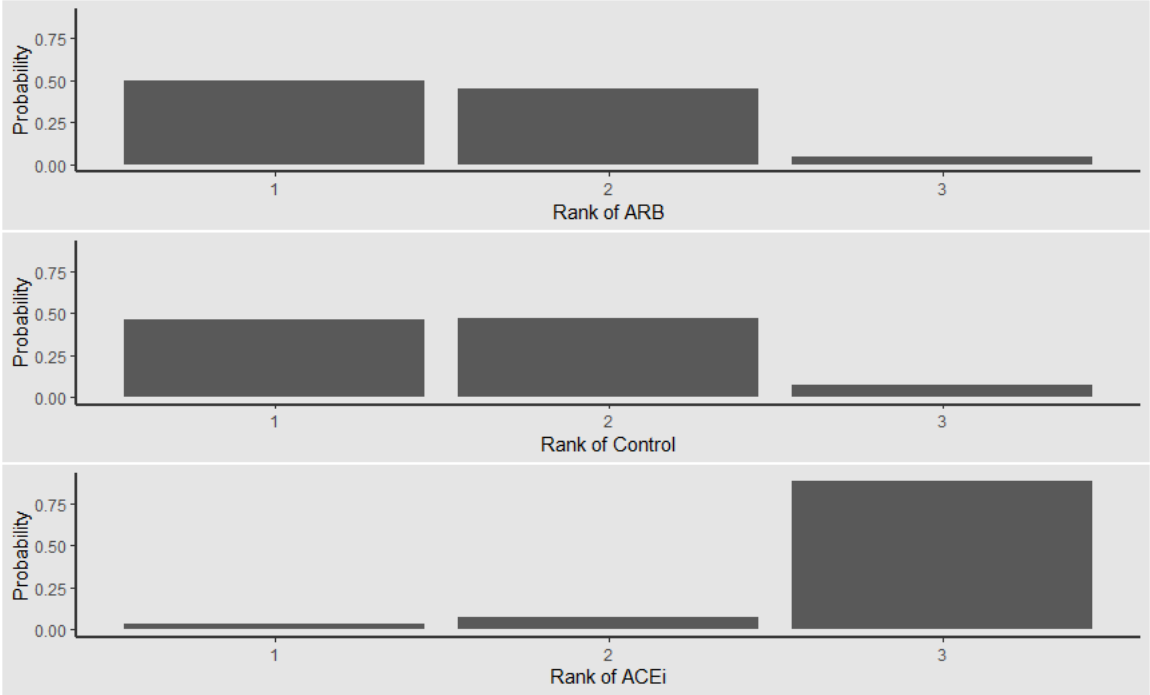

**Figure S21: Cerebrovascular Events**

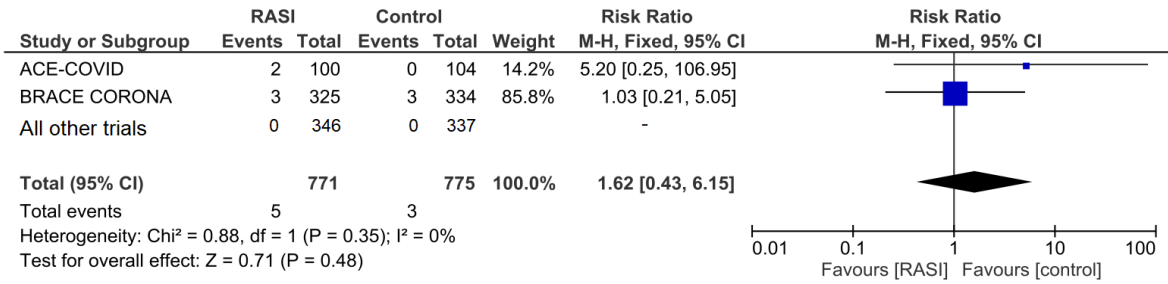

**Figure S22: Congestive Cardiac Failure**

**(A) Random Effects**

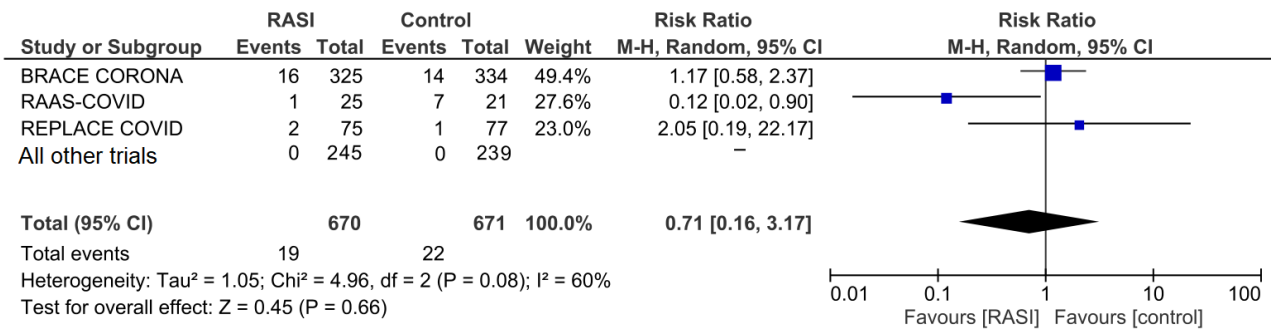

**(B) Fixed Effects**

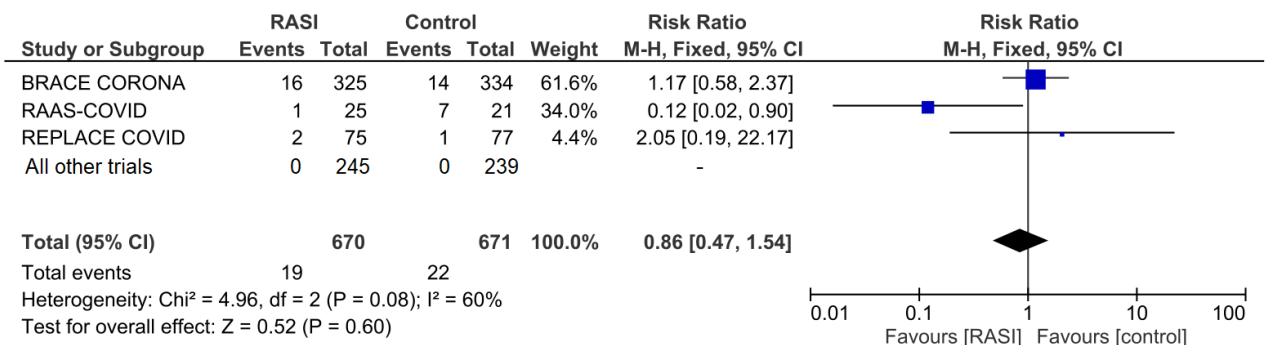

**Figure S23: Venous Thromboembolism**

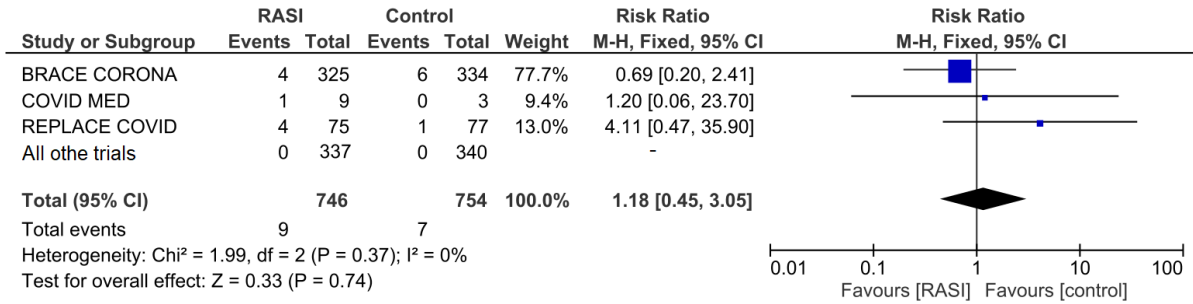

**Figure S24: Hospitalisation**

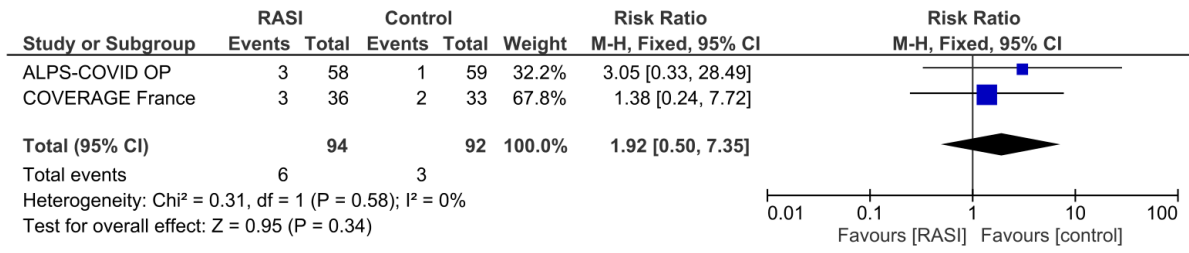

**Figure S25: ICU admission –Start vs Continue/Discontinue Trials**

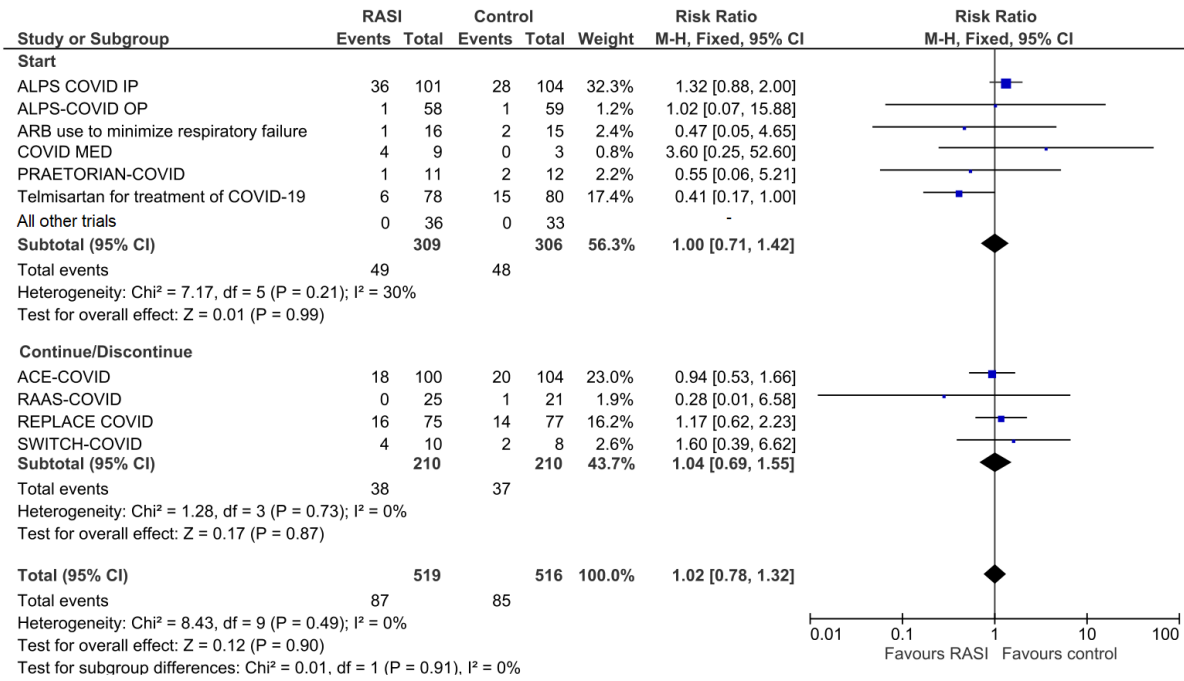

**Figure S26: Mechanical Ventilation –Start vs Continue/Discontinue Trials**

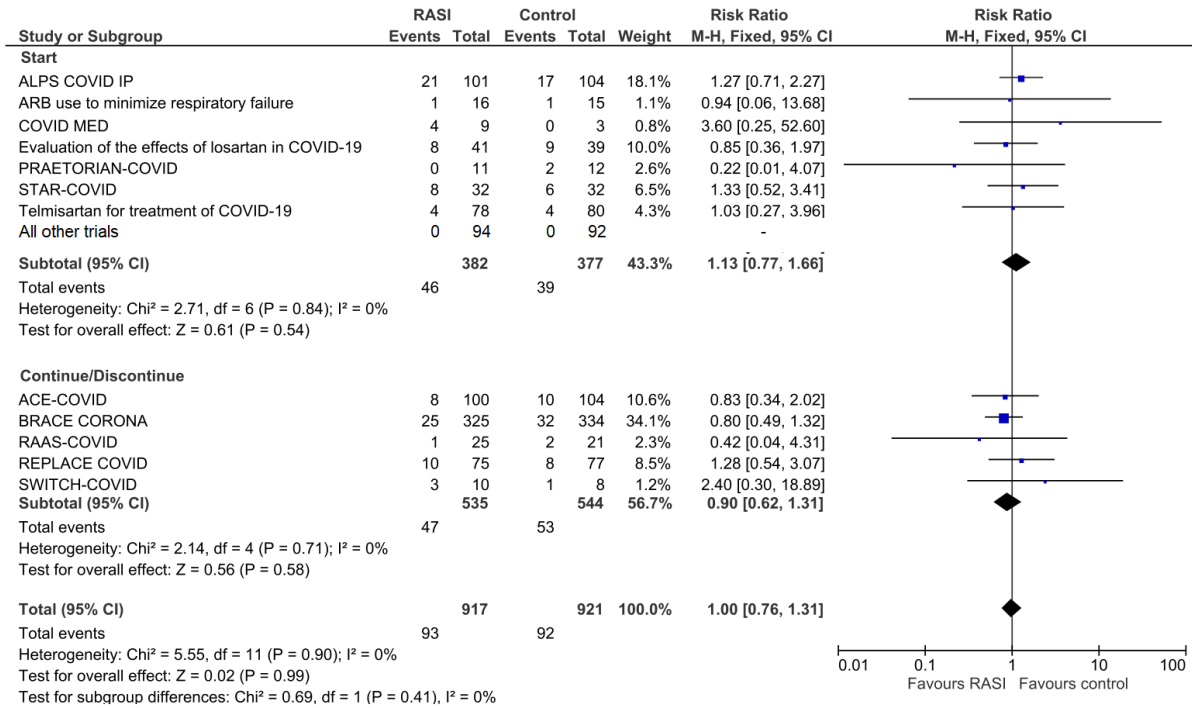

**Figure S27: Hypotension requiring Inotropes by COVID-19 severity**

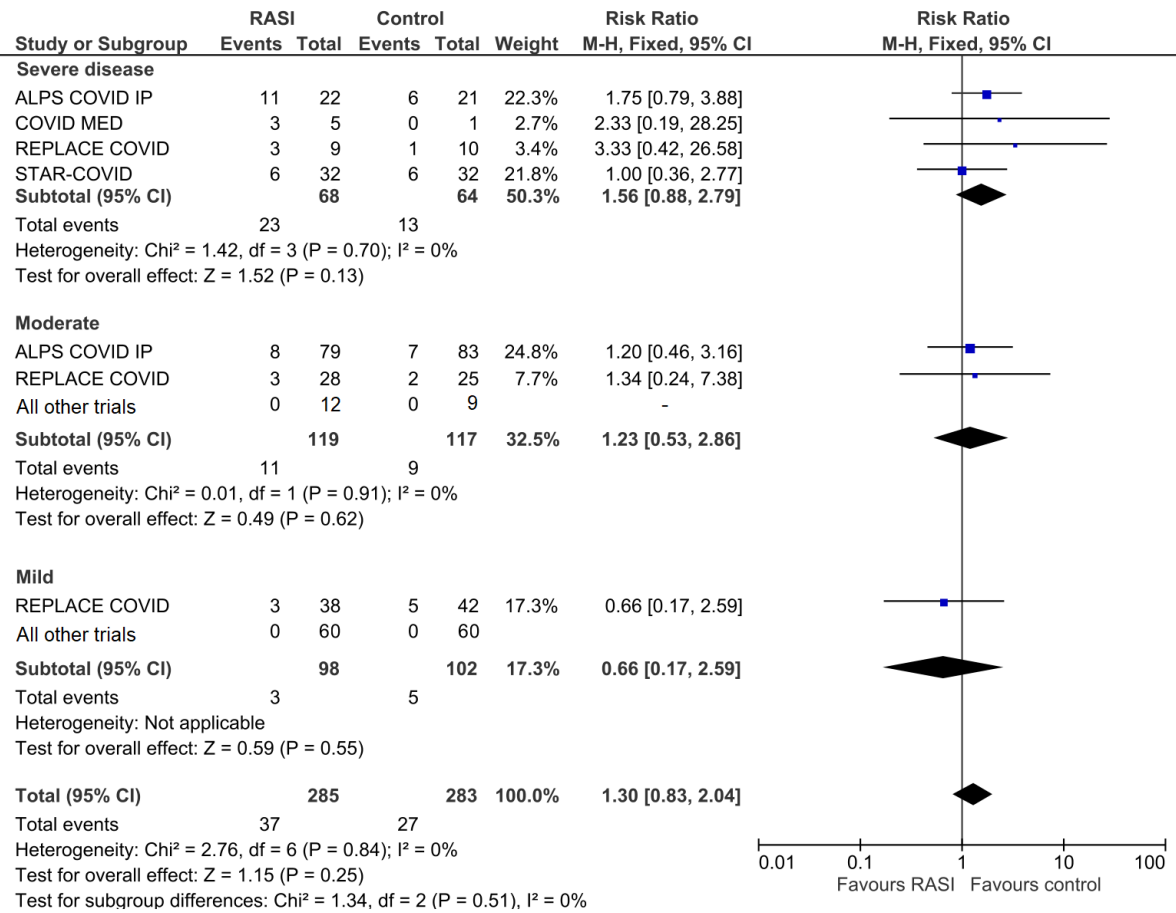



**Figure S28: Inotropes – Start vs Continue/Discontinue Trials**

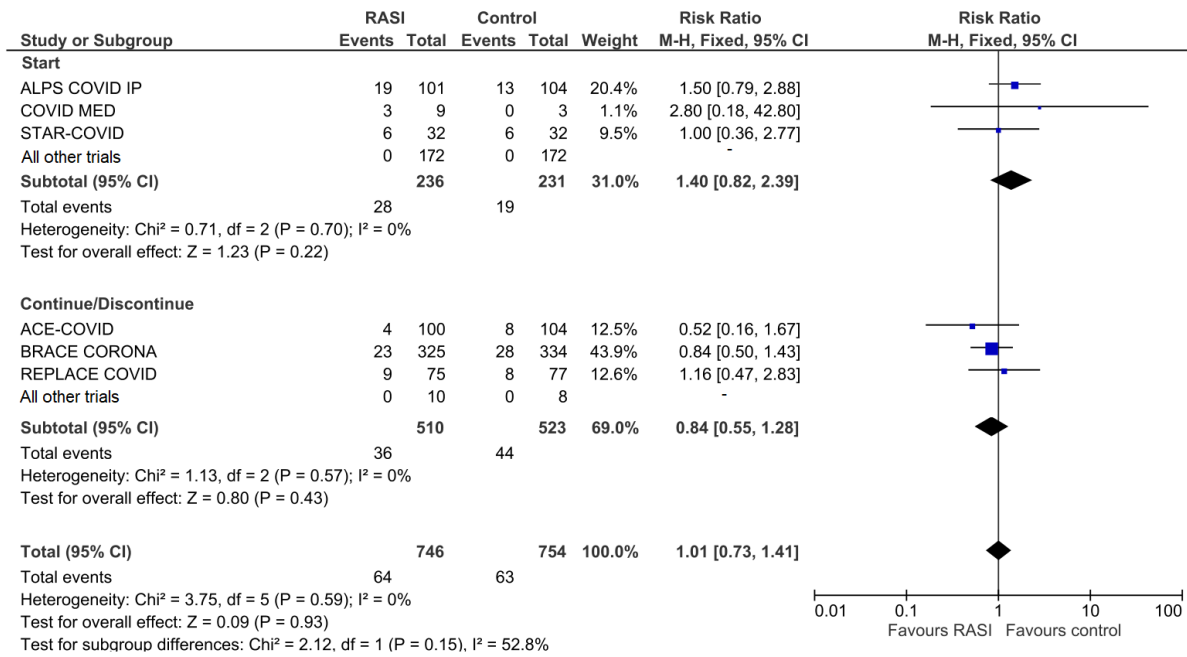

**Figure S29: Acute Kidney Injury – Start vs Continue/Discontinue Trials**

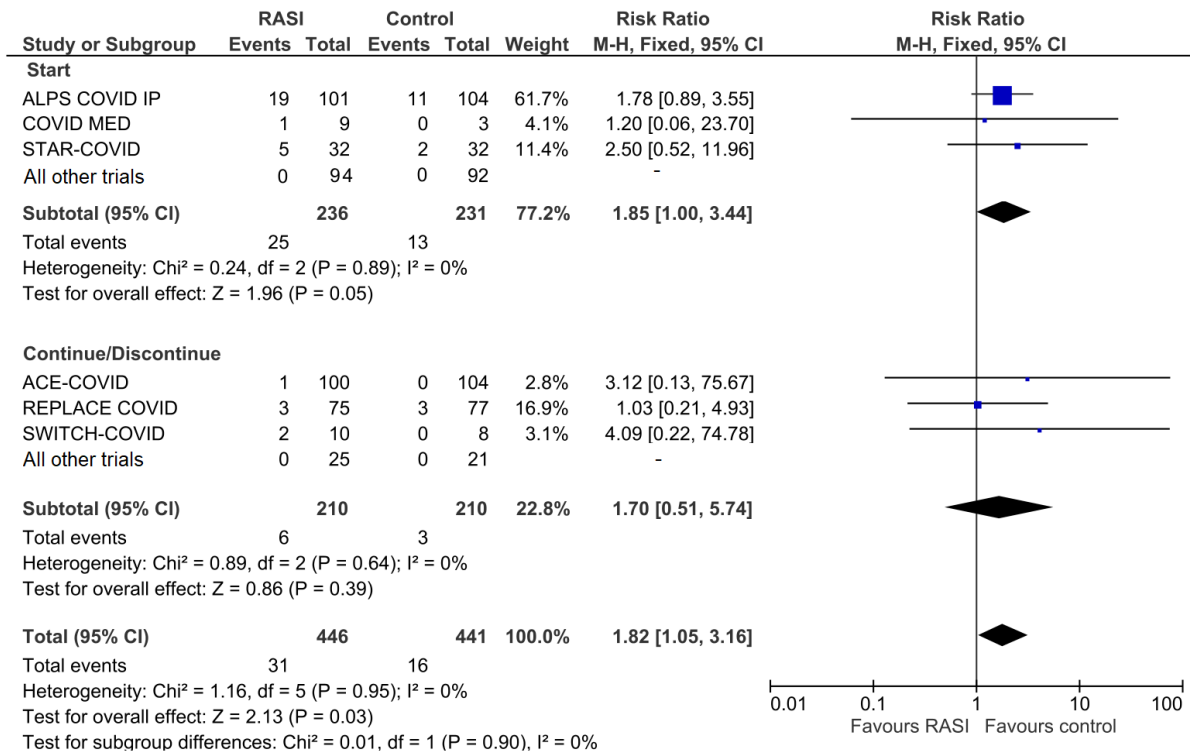

**Figure S30: Acute Kidney Injury – Severity of COVID-19**

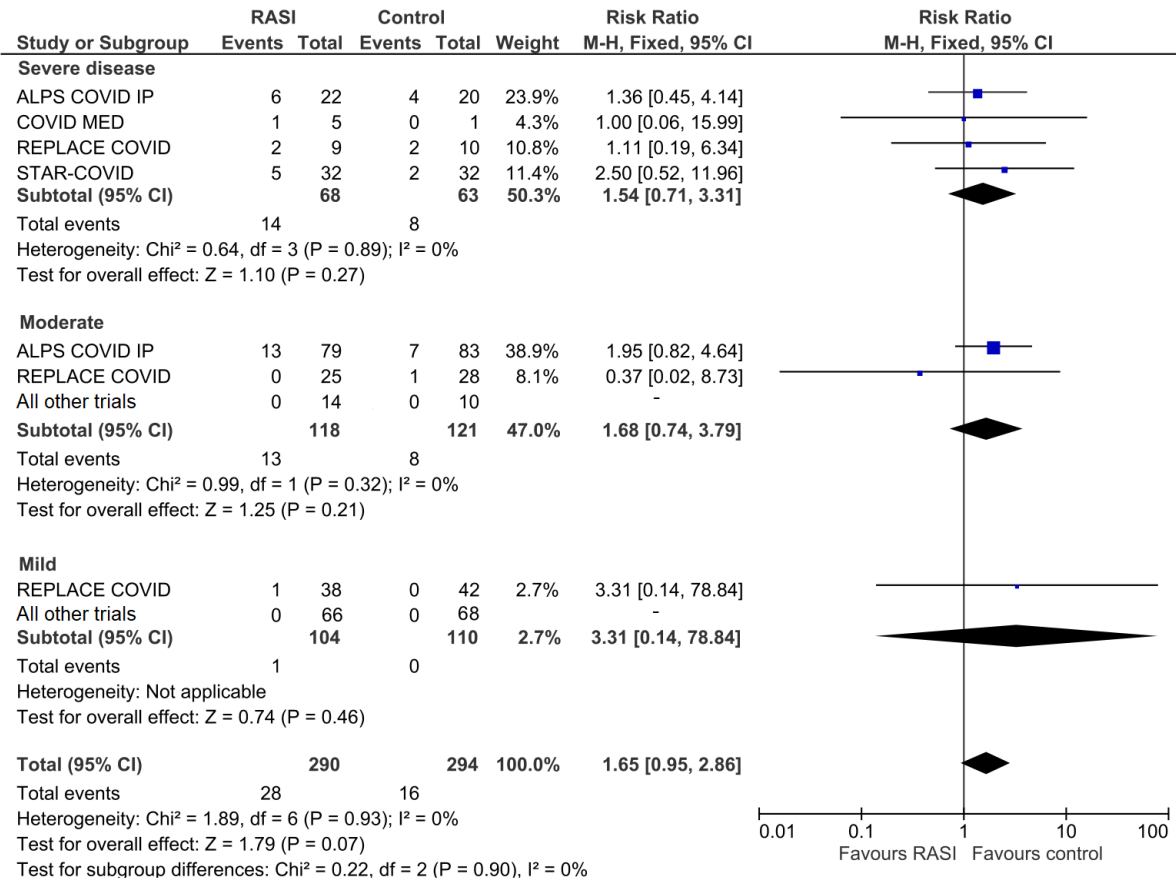

Supplement: JAH3-11-e026143-s001.pdf [file JAH3-11-e026143-s001.pdf]
